# Supplementary material for: Assessing a Large-Scale Sequential In Situ Chloroethene Bioremediation System Using Compound-Specific Isotope Analysis (CSIA) and Geochemical Modeling
Source: MDPI journal article supplement (doi:10.3390/pollutants2040031), 2022-11-11
Supplement: s1 [file s1]

Archive with 1 entries (1 files):
- pollutants-1910222-supplementary.pdf
