# Supplementary material for: Assessing a Large-Scale Sequential In Situ Chloroethene Bioremediation System Using Compound-Specific Isotope Analysis (CSIA) and Geochemical Modeling
Source: MDPI journal article supplement (doi:10.3390/pollutants2040031), 2022-11-11
Supplement: s1 [file s1 › pollutants-1910222-supplementary.pdf]

## **Supplementary material**

# **Assessing a Large-Scale Sequential In-Situ Chloroethene Bioremediation System Using Compound-Specific Isotope Analysis (CSIA) and Geochemical Modeling**

Giulia Casiraghi<sup>1</sup>, Daniele Pedretti<sup>1\*</sup>, Giovanni P. Beretta<sup>1</sup>, Marco Masetti<sup>1</sup>, Simone Varisco<sup>1</sup>

<sup>1</sup>Università degli Studi di Milano, Dipartimento di Scienze della Terra "A. Desio", Milano, Italy

\* [daniele.pedretti@unimi.it](mailto:daniele.pedretti@unimi.it)

## **Contents**

|                                              |    |
|----------------------------------------------|----|
| Enrichment factors - literature review ..... | 2  |
| Monitoring data - complete time series ..... | 5  |
| Sensitivity analysis – key results .....     | 14 |
| Isotopic shifts .....                        | 19 |

**Supplementary material**

## Enrichment factors - literature review

In the following tables (Table S1 and Table S2) enrichment factors obtained by [1] and [2] are reported.

Table S1 Enrichment factors for reductive dechlorination ( $\epsilon_{RD}$ ).

| PCE                                          |                   |        |          |                          |
|----------------------------------------------|-------------------|--------|----------|--------------------------|
| Strain                                       | $\epsilon$ (‰)    |        | $\alpha$ | Reference                |
|                                              | lit               | avg    | avg      |                          |
| Dehalococcoides ethenogenes strain 195       | $-6 \pm 0.7$      | -6.00  | 0.994    | Cichocka et al., 2008    |
| Bacterial consortium (BDI) (dehalococcoides) | $-7.12 \pm 0.72$  | -7.12  | 0.9929   | Liang et al., 2007       |
| Dehalococcoides sp. strain CBDB1             | $-1.6 \pm 0.3$    | -1.60  | 0.9984   | Marco-Urrea et al., 2011 |
| Dehalococcoides                              | $-3.3 \pm 1.2$    | -3.30  | 0.9967   | Aeppli et al., 2010      |
|                                              | AVG               | -4.51  |          |                          |
|                                              | MIN               | -7.12  |          |                          |
|                                              | MAX               | -1.60  |          |                          |
| TCE                                          |                   |        |          |                          |
| Strain                                       | $\epsilon$ (‰)    |        | $\alpha$ | Reference                |
|                                              | lit               | avg    | avg      |                          |
| Dehalococcoides mixed culture                | $-16.4 \pm 0.4$   | -16.40 | 0.9836   | Kuder et al., 2013       |
| Dehalococcoides-containing enrichment        | $-16 \pm 0.6$     | -16.00 | 0.9840   | Lee et al., 2007         |
| Dehalococcoides mixed culture                | -15.3             | -15.30 | 0.9847   | Kuder et al., 2013       |
| Bacterial consortium (BDI) (dehalococcoides) | $-15.27 \pm 0.79$ | -15.27 | 0.9847   | Liang et al., 2007       |
| Dehalococcoides ethenogenes strain 195       | $-13.7 \pm 1.8$   | -13.70 | 0.9863   | Cichocka et al., 2008    |
| Dehalococcoides sp. strain CBDB1             | $-11.2 \pm 2.6$   | -11.20 | 0.9888   | Marco-Urrea et al., 2011 |
| Dehalococcoides ethenogenes                  | $-9.6 \pm 0.4$    | -9.60  | 0.9904   | Lee et al., 2007         |
| Dehalococcoides pure culture FL2 (tceA)      | $-8.0 \pm 0.4$    | -8.00  | 0.9920   | Fletcher et al., 2011    |
| Dehalobacter restrictus                      | $-7.7 \pm 0.4$    | -7.70  | 0.9923   | Renpenning et al., 2015  |
| Dehalobacter restrictus PER-K23              | $-3.3 \pm 0.3$    | -3.30  | 0.9967   | Lee et al., 2007         |
|                                              | AVG               | -11.65 |          |                          |
|                                              | MIN               | -16.40 |          |                          |
|                                              | MAX               | -3.30  |          |                          |
| cis-DCE                                      |                   |        |          |                          |
| Strain                                       | $\epsilon$ (‰)    |        | $\alpha$ | Reference                |
|                                              | lit               | avg    | avg      |                          |
| Dehalococcoides BTF08                        | $-30.5 \pm 1.5$   | -30.50 | 0.9695   | Schmidt et al., 2014b    |
| Dehalococcoides-containing enrichment ANAS   | $-29.7 \pm 1.6$   | -29.70 | 0.9703   | Lee et al., 2007         |

Casiraghi *et al* (2022), Assessing a large-scale sequential in-situ chloroethene bioremediation system using compound-specific isotope analysis (CSIA) and geochemical modeling. *Pollutants*.

**Supplementary material**

|                                          |             |        |        |                       |
|------------------------------------------|-------------|--------|--------|-----------------------|
| Dehalococcoides mixed culture            | -26.8       | -26.80 | 0.9732 | Kuder et al., 2013    |
| Dehalococcoides-containing consortia BDI | -25.3 ± 1.0 | -25.30 | 0.9747 | Fletcher et al., 2011 |
| Dehalococcoides pure culture GT (vcrA)   | -21.6 ± 1.3 | -21.60 | 0.9784 | Fletcher et al., 2011 |
| Dehalococcoides ethenogenes              | -21.1 ± 1.8 | -21.10 | 0.9789 | Lee et al., 2007      |
| W. Dehalococcoides                       | -18.5 ± 1.8 | -18.50 | 0.9815 | Abe et al., 2009      |
| W. Dehalococcoides                       | -18.5 ± 1.3 | -18.50 | 0.9815 | Abe et al., 2009      |
| Dehalococcoides pure culture VS (vcrA)   | -17.6 ± 2.7 | -17.60 | 0.9824 | Fletcher et al., 2011 |
| Dehalococcoides sp. BAV1                 | -16.9 ± 1.4 | -16.90 | 0.9831 | Lee et al., 2007      |
| Dehalococcoides pure culture FL2 (tceA)  | -15.8 ± 1.1 | -15.80 | 0.9842 | Fletcher et al., 2011 |
| Dehalococcoides pure culture BAV1 (bvcA) | -14.9 ± 0.5 | -14.90 | 0.9851 | Fletcher et al., 2011 |
|                                          | AVG         | -21.43 |        |                       |
|                                          | MIN         | -30.50 |        |                       |
|                                          | MAX         | -14.90 |        |                       |

| VC                                         |              |        |        |                       |
|--------------------------------------------|--------------|--------|--------|-----------------------|
| Strain                                     | e (‰)        |        | α      | Reference             |
|                                            | lit          | avg    | avg    |                       |
| W. Dehalococcoides                         | -25.0 ± 0.72 | -25.00 | 0.9750 | Abe et al., 2009      |
| W. Dehalococcoides                         | -25.4 ± 1.1  | -25.40 | 0.9746 | Abe et al., 2009      |
| Dehalococcoides pure culture BAV1 (bvcA)   | -23.2 ± 1.8  | -23.20 | 0.9768 | Fletcher et al., 2011 |
| Dehalococcoides pure culture GT (vcrA)     | -23.8 ± 1.1  | -23.80 | 0.9762 | Fletcher et al., 2011 |
| Dehalococcoides pure culture VS (vcrA)     | -22.1 ± 1.2  | -22.10 | 0.9779 | Fletcher et al., 2011 |
| Dehalococcoides-containing consortia BDI   | -19.9 ± 1.6  | -19.90 | 0.9801 | Fletcher et al., 2011 |
| Dehalococcoides mixed culture              | -26.7 ± 1.9  | -27.40 | 0.9726 | Kuder et al., 2013    |
| Dehalococcoides mixed culture              | -28.1        | -27.40 | 0.9726 | Kuder et al., 2013    |
| Dehalococcoides sp. BAV1                   | -24 ± 2.0    | -24.00 | 0.9760 | Lee et al., 2007      |
| Dehalococcoides-containing enrichment ANAS | -22.7 ± 0.8  | -22.70 | 0.9773 | Lee et al., 2007      |
| Dehalococcoides BTF08                      | -28.8 ± 1.5  | -28.80 | 0.9712 | Schmidt et al., 2014b |
|                                            | AVG          | -24.52 |        |                       |
|                                            | MIN          | -28.80 |        |                       |
|                                            | MAX          | -19.90 |        |                       |

**Supplementary material**

Table S2 – Enrichment factors for oxidation ( $\epsilon_{ox}$ ).

| cis-DCE                           |                |        |          |                         |
|-----------------------------------|----------------|--------|----------|-------------------------|
| Strain                            | e (‰)          |        | $\alpha$ | Reference               |
|                                   | lit            | avg    | avg      |                         |
| Beta-Proteobacterium strain JS666 | -8.5 ± 0.1     | -8.50  | 0.9915   | Abe et al., 2009        |
| Pseudomonas putida F1             | -1.1 ± 0.77    | -1.10  | 0.9989   | Clingenpeel et al. 2012 |
| Pseudomonas fluorescens CFS215    | -1.23 ± 0.45   | -1.20  | 0.9988   | Clingenpeel et al. 2012 |
| Pseudomonas mendocina KR1         | -0.9 ± 0.51    | -0.90  | 0.9991   | Clingenpeel et al. 2012 |
| Polaromonas s. strain JS666       | -19.9 ± 2.5    | -19.90 | 0.9801   | Jennings et al., 2009   |
| Enrichment culture                | -15.2 ± 0.5    | -15.20 | 0.9848   | Schmidt et al., 2010    |
| Enrichment culture                | -9.8 ± 1.7     | -9.80  | 0.9902   | Tiehm et al., 2008      |
| Enrichment culture                | -8.8 ± 1.0     | -8.80  | 0.9912   | Tiehm et al., 2008      |
| Enrichment culture                | -7.1 ± 0.9     | -7.10  | 0.9929   | Tiehm et al., 2008      |
| Enrichment culture                | -8.2 ± 3.5     | -8.20  | 0.9918   | Tiehm et al., 2008      |
| Mixed culture                     | -7.2           | -7.20  | 0.9928   | Pooley et al., 2009     |
|                                   | AVG            | -7.99  |          |                         |
|                                   | MIN            | -19.90 |          |                         |
|                                   | MAX            | -0.90  |          |                         |
| VC                                |                |        |          |                         |
| Strain                            | e (‰)          |        | $\alpha$ | Reference               |
|                                   | lit            | avg    | avg      |                         |
| Nocardioides strain JS614         | -7.2 ± 0.16    | -7.20  | 0.9928   | Abe et al., 2009        |
| Nocardioides strain JS614         | -7.3 ± 0.07    | -7.30  | 0.9927   | Abe et al., 2009        |
| Mycobacterium sp. JS60            | -8.2           | -8.20  | 0.9918   | Chartrand et al., 2005  |
| Mycobacterium sp. JS61            | -7.1           | -7.10  | 0.9929   | Chartrand et al., 2005  |
| Mycobacterium sp. JS62            | -7             | -7.00  | 0.9930   | Chartrand et al., 2005  |
| Mycobacterium sp. JS63            | -7.6           | -7.60  | 0.9924   | Chartrand et al., 2005  |
| Mycobacterium aurum L1            | -5.7 ± 1.1     | -5.70  | 0.9943   | Chu et al., 2004        |
| Methylosinus trichosporium OB3b   | -3.2 ± 0.3     | -3.20  | 0.9968   | Chu et al., 2004        |
| Mycobacterium vaccae JOB5         | -4.8 ± 0.3     | -4.80  | 0.9952   | Chu et al., 2004        |
| Enrichment culture (Alameda)      | -4.5 ± 1.0     | -4.50  | 0.9955   | Chu et al., 2004        |
| Enrichment culture (Travis)       | -5.5 ± 0.8     | -5.50  | 0.9945   | Chu et al., 2004        |
| Enrichment culture                | -6.3/-6.5      | -6.40  | 0.9936   | Chu et al., 2004        |
| Enrichment culture                | -5.5/-5.4/-5.4 | -5.40  | 0.9946   | Chu et al., 2004        |
| Enrichment culture                | -6.3 ± 0.3     | -6.30  | 0.9937   | Tiehm et al., 2008      |
| Enrichment culture                | -6.5 ± 0.4     | -6.50  | 0.9935   | Tiehm et al., 2008      |
| Enrichment culture                | -5.5 ± 0.3     | -5.50  | 0.9945   | Tiehm et al., 2008      |
| Enrichment culture                | -5.4 ± 0.8     | -5.40  | 0.9946   | Tiehm et al., 2008      |
| Enrichment culture                | -5.4 ± 0.4     | -5.40  | 0.9946   | Tiehm et al., 2008      |
|                                   | AVG            | -6.06  |          |                         |
|                                   | MIN            | -8.20  |          |                         |
|                                   | MAX            | -3.20  |          |                         |

**Supplementary material**

## Monitoring data - complete time series

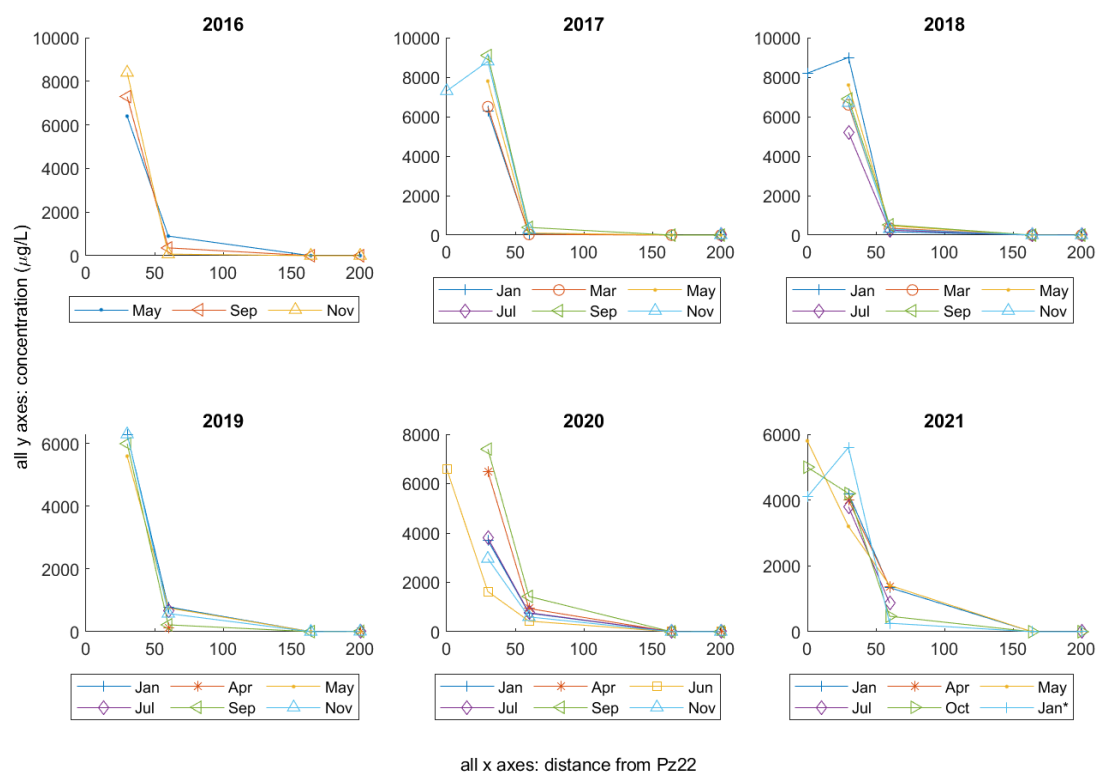

Figure S1 –Time series of PCE concentrations. In the 2021 subplot, the “Jan\*” time series corresponds to measurements collected in January 2022.

**Supplementary material**

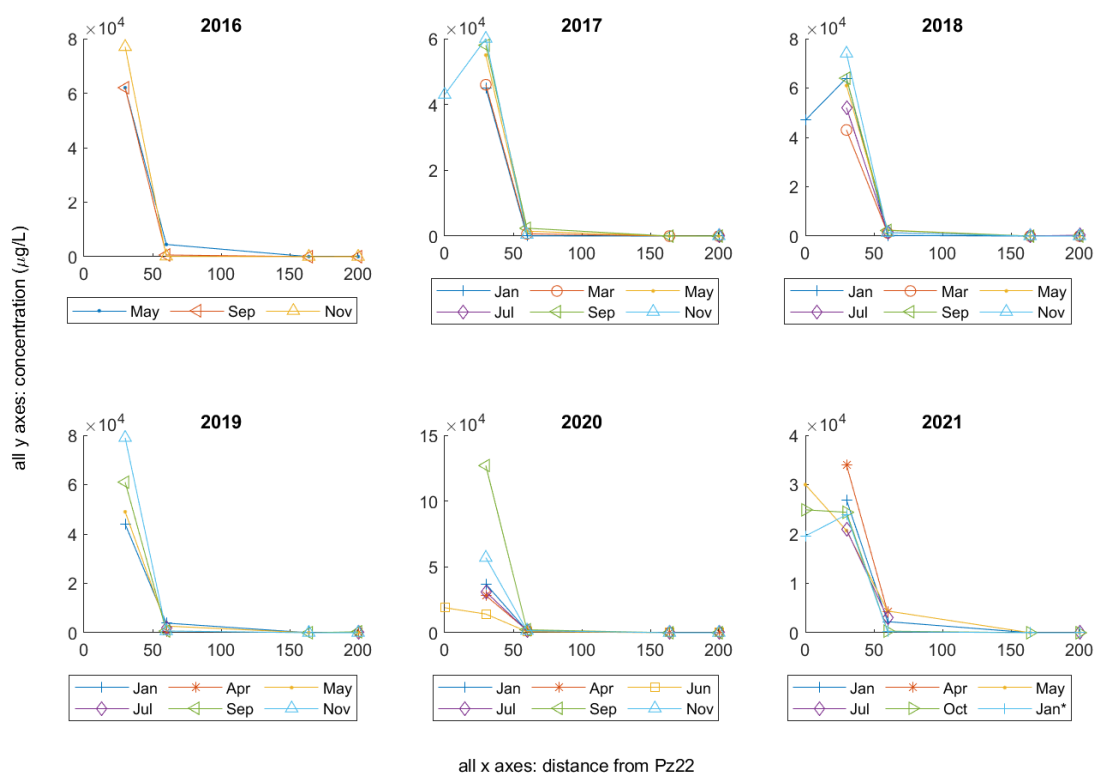

Figure S2 –Time series of TCE concentrations. In the 2021 subplot, the “Jan\*” time series corresponds to measurements collected in January 2022.

**Supplementary material**

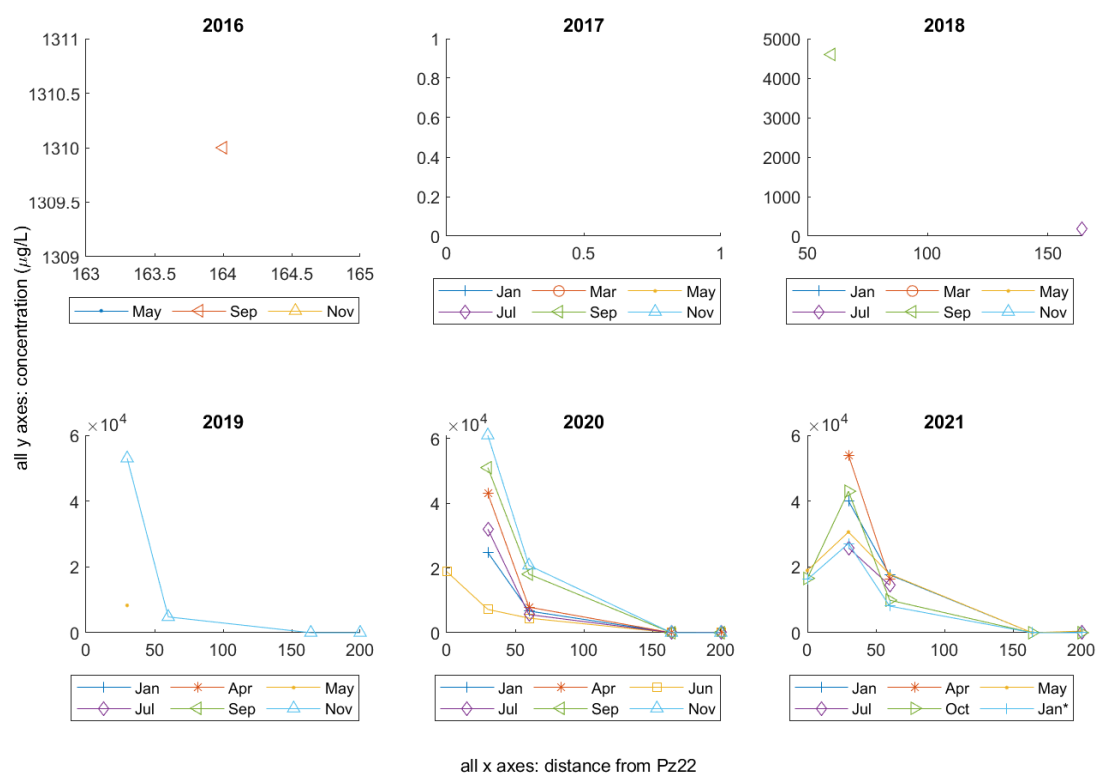

Figure S3 –Time series of *cis*-DCE concentrations. In the 2021 subplot, the “Jan\*” time series corresponds to measurements collected in January 2022.

**Supplementary material**

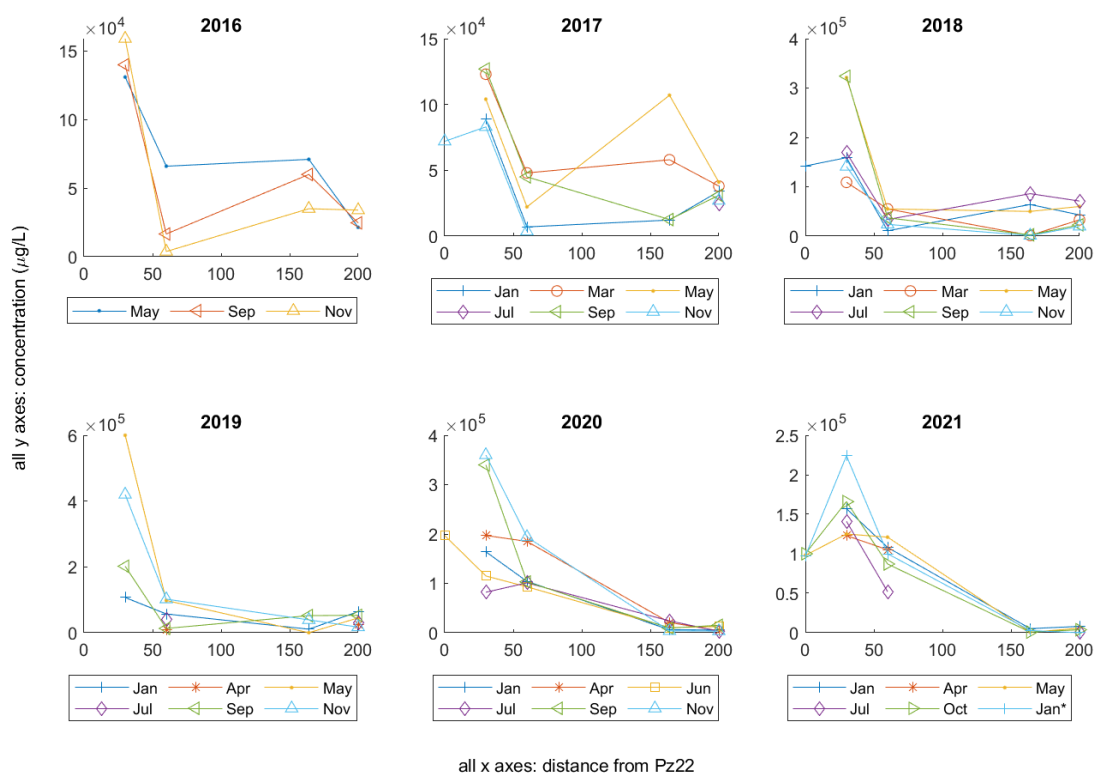

Figure S4 –Time series of VC concentrations. In the 2021 subplot, the “Jan\*” time series corresponds to measurements collected in January 2022.

**Supplementary material**

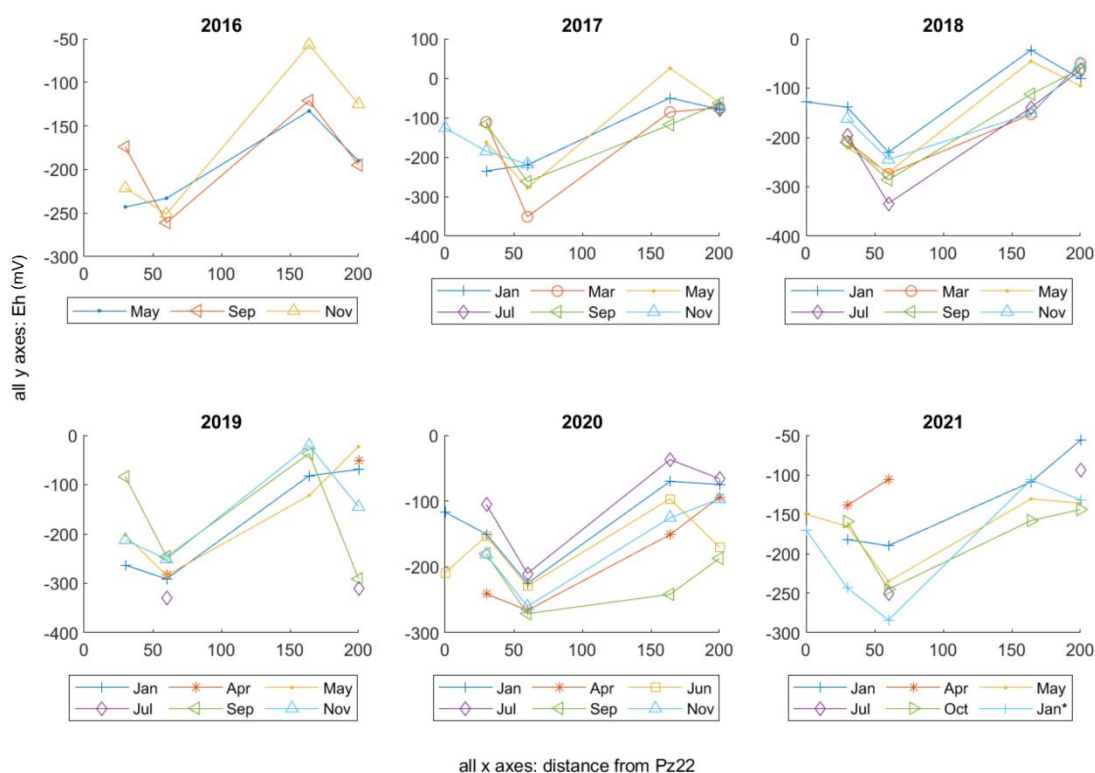

Figure S5 –Time series of Eh values. In the 2021 subplot, the “Jan\*” time series corresponds to measurements collected in January 2022.

**Supplementary material**

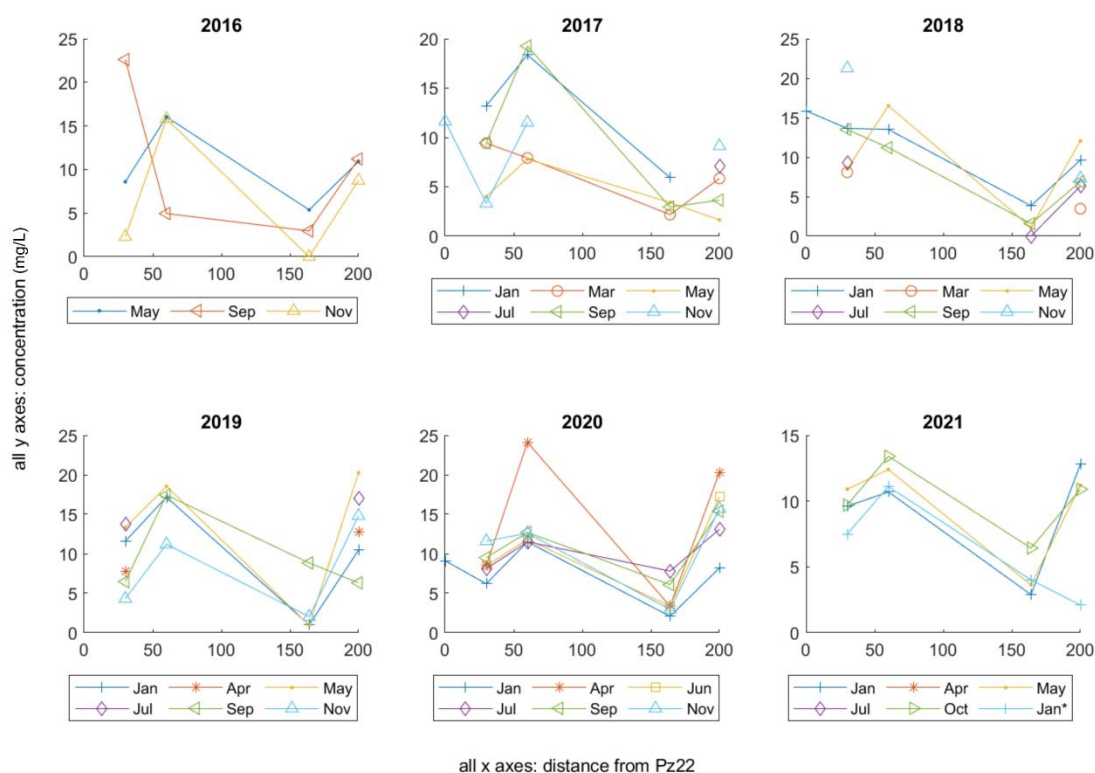

Figure S6 –Time series of ammonium concentrations. In the 2021 subplot, the “Jan\*” time series corresponds to measurements collected in January 2022.

**Supplementary material**

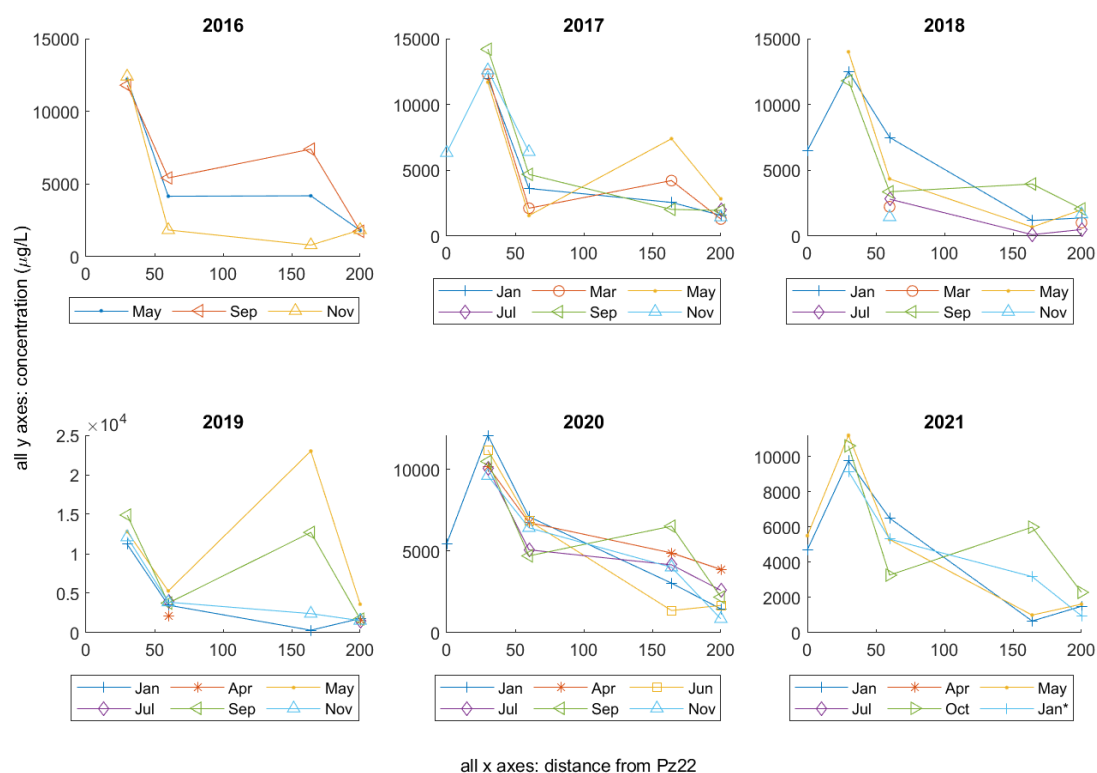

Figure S7 –Time series of iron concentrations. In the 2021 subplot, the “Jan\*” time series corresponds to measurements collected in January 2022.

**Supplementary material**

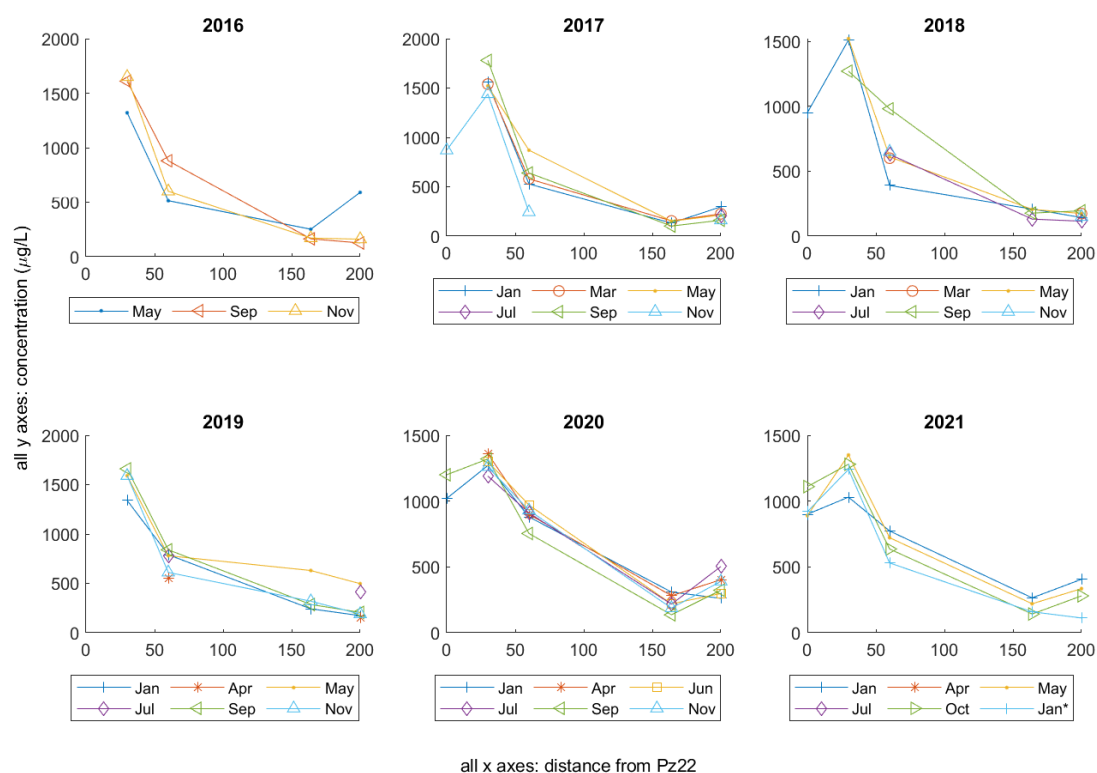

Figure S8 –Time series of manganese concentrations. In the 2021 subplot, the “Jan\*” time series corresponds to measurements collected in January 2022.

**Supplementary material**

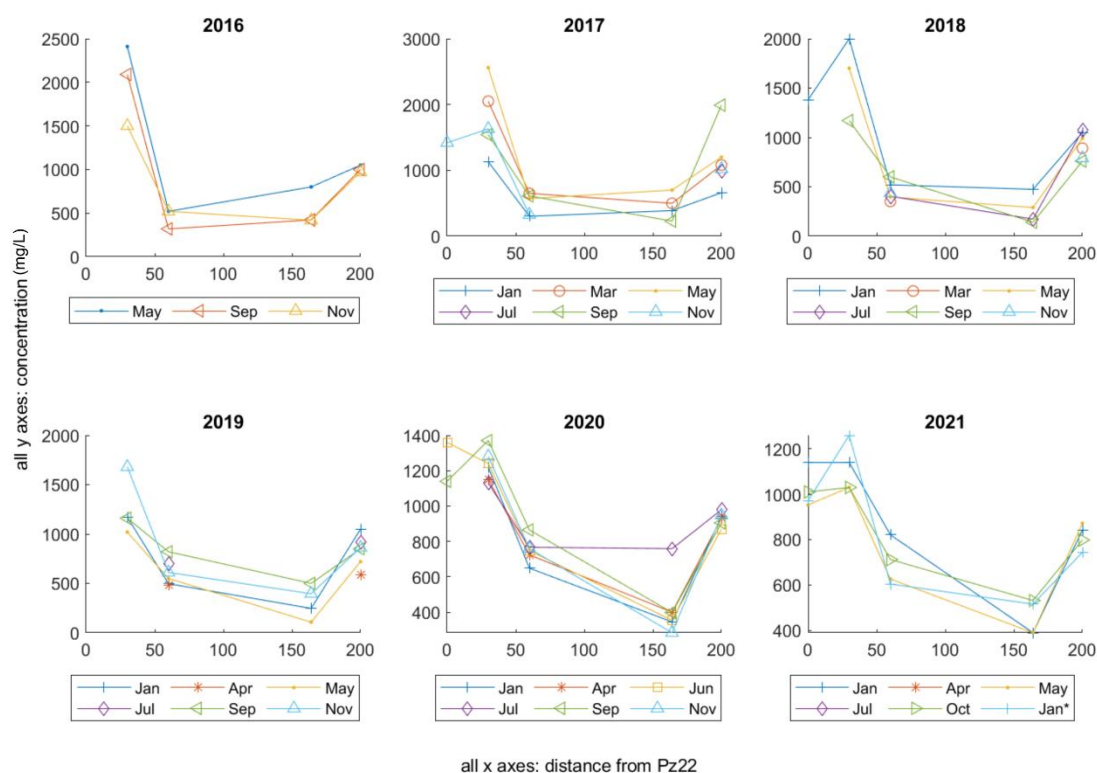

Figure S9 –Time series of sulfate concentrations. In the 2021 subplot, the “Jan\*” time series corresponds to measurements collected in January 2022.

**Supplementary material**

## Sensitivity analysis – key results

In “Approach 2”,  $k$  and  $\epsilon$  values were fitted considering two further values of longitudinal dispersion ( $\alpha_L=5$  and 10m) in addition to  $\alpha_L=22.4$ m determined following [3]. The results are reported in Table S1. Overall lower wRMSE were obtained using  $\alpha_L=22.4$ m. Slightly different calibrated values for  $k$  and  $\epsilon$  were obtained in the three cases, with  $\epsilon$  values generally more similar to literature mean values for  $\alpha_L=22.4$ m. For lower  $\alpha_L$  ( $\alpha_L=5$ m, in particular) calibrated  $\epsilon_{RD}$  values almost coincided with the upper limit of the literature range for TCE and DCE.

Table S3 - Calibrated  $k$  and  $\epsilon$  values for the tested scenarios with May 2021 data.

|                                                                                 | PCE  | TCE   | cis-DCE | VC     |
|---------------------------------------------------------------------------------|------|-------|---------|--------|
| <b><math>\alpha_L = 22.4</math>m</b>                                            |      |       |         |        |
| <i>Approach 2 - Reductive Dechlorination (RD)</i>                               |      |       |         |        |
| $k_{RD1}$ ( $y^{-1}$ )                                                          | 0.3  | 0.2   | 0       | 0      |
| $k_{RD2}$ ( $y^{-1}$ )                                                          | 6.5  | 2.9   | 0.6     | 0      |
| $\epsilon_{RD}$ (‰)                                                             | -5.6 | -5.7  | -16.0   | 0      |
| <i>Approach 2 – Oxidation (OX) using the average <math>\epsilon_{OX}</math></i> |      |       |         |        |
| $k_{OX}$ ( $y^{-1}$ )                                                           | -    | -     | 4.7     | 2.9    |
| $\epsilon_{OX}$ (‰)                                                             | -    | -     | -7.99   | -6.06  |
| <i>wRMSE (average <math>\epsilon_{OX}</math>)</i>                               |      |       |         |        |
| concentrations                                                                  | 1.10 | 13.14 | 24.08   | 157.76 |
| CSIA                                                                            | 1.88 | 0.13  | 1.12    | 0.80   |
| <b><math>\alpha_L = 10</math>m</b>                                              |      |       |         |        |
| <i>Approach 2 - Reductive Dechlorination (RD)</i>                               |      |       |         |        |
| $k_{RD1}$ ( $y^{-1}$ )                                                          | 0.38 | 0.25  | 0       | 0      |
| $k_{RD2}$ ( $y^{-1}$ )                                                          | 5.5  | 2.8   | 0.53    | 0      |
| $\epsilon_{RD}$ (‰)                                                             | -4.3 | -4.4  | -15.2   | -      |
| <i>Approach 2 – Oxidation (OX) using the average <math>\epsilon_{OX}</math></i> |      |       |         |        |
| $k_{OX}$ ( $y^{-1}$ )                                                           | -    | -     | 2.3     | 2.1    |
| $\epsilon_{OX}$ (‰)                                                             | -    | -     | -7.99   | -6.06  |
| <i>wRMSE</i>                                                                    |      |       |         |        |
| concentrations                                                                  | 1.15 | 14.42 | 28.26   | 193.77 |
| CSIA                                                                            | 1.89 | 0.10  | 1.19    | 0.73   |
| <b><math>\alpha_L = 5</math>m</b>                                               |      |       |         |        |
| <i>Approach 2 - Reductive Dechlorination (RD)</i>                               |      |       |         |        |
| $k_{RD1}$ ( $y^{-1}$ )                                                          | 0.4  | 0.3   | 0       | 0      |
| $k_{RD2}$ ( $y^{-1}$ )                                                          | 4.8  | 2.7   | 0.5     | 0      |
| $\epsilon_{RD}$ (‰)                                                             | -3.4 | -3.5  | -14.9   | -      |
| <i>Approach 2 – Oxidation (OX) using the average <math>\epsilon_{OX}</math></i> |      |       |         |        |
| $k_{OX}$ ( $y^{-1}$ )                                                           | -    | -     | 1.3     | 1.8    |
| $\epsilon_{OX}$ (‰)                                                             | -    | -     | -7.99   | -6.06  |
| <i>wRMSE</i>                                                                    |      |       |         |        |
| concentrations                                                                  | 1.09 | 13.82 | 30.81   | 212.49 |
| CSIA                                                                            | 2.02 | 0.14  | 1.25    | 0.69   |

**Supplementary material**

A higher  $\alpha_L$  value was also tested ( $\alpha_L=32.4\text{m}$ ), but it resulted in an  $\varepsilon_{RD}$  for PCE equal to the lower limit of the literature range ( $\varepsilon_{RD}=-7.2\text{‰}$ ), so the calibration of  $k$  and  $\varepsilon$  for the other daughter compounds (TCE, cis-DCE and VC) was not carried out and data not reported for this case. Due to this reasons  $\alpha_L=22.4\text{m}$  was chosen.

The second step of the sensitivity analysis was carried out by varying the best-fitted  $\varepsilon_{RD}$  values obtained for PCE, TCE and cis-DCE by  $\pm 0.1$  and  $\pm 1.0$ . The variation of  $k_{RD2}$  by  $\pm 0.1$  did not produce noteworthy modifications of isotopic compositions and concentrations for PCE and TCE. Thus, only variations of  $\pm 1.0\text{y}^{-1}$  were further considered for these compounds. As for cis-DCE only a  $k_{RD2}$  variation of  $\pm 0.1$  was evaluated due to the low degradation rates of this compound.

For PCE, variations of  $\pm 0.1$  of both parameters did not produce noteworthy modifications to simulated concentrations. While enrichment factors changed, they remained within standard deviations for PCE  $\delta^{13}\text{C}$  ( $\pm 0.25\text{‰}$  for  $k_{RD2}$  variation and  $\pm 0.55\text{‰}$  for  $\varepsilon_{RD}$  variation) and daughter products ( $<0.02\text{‰}$  for TCE and even smaller for cis-DCE and VC). For PCE, a change by  $\pm 1.0\text{‰}$  in  $\varepsilon_{RD}$  (Figure S10) generated an isotopic shift of  $\Delta^{13}\text{C}=\pm 5.3\text{‰}$ . For TCE, the shift remained below  $<0.2\text{‰}$ . No shift was observed for cis-DCE and VC.

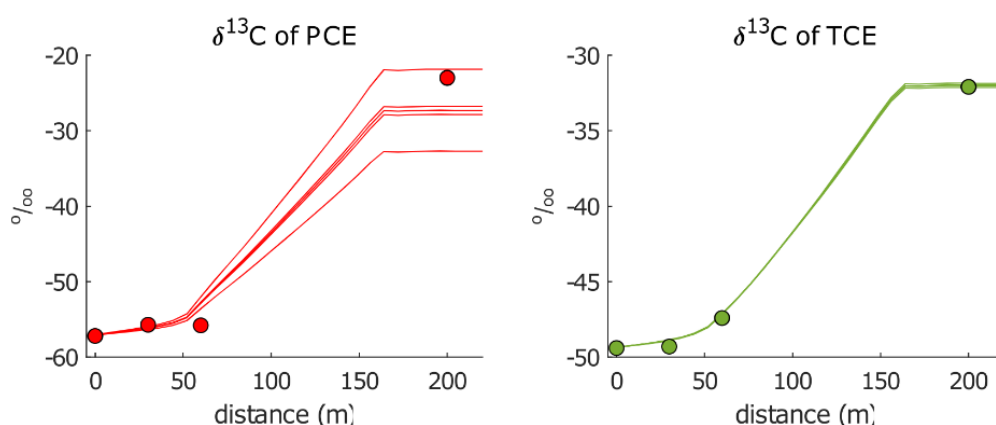

Figure S10 – Variation of isotopic composition of PCE and TCE after varying  $\varepsilon_{RD}$  by  $\pm 1.0\text{‰}$  and  $0.1\text{‰}$ .

Considering the calibrated value of  $\varepsilon_{RD}$  for PCE ( $-5.6\text{‰}$ ), a change in  $k_{RD2}$  of  $\pm 1.0\text{y}^{-1}$  produces a  $\Delta^{13}\text{C}=\pm 2.5\text{‰}$  in PCE, while only a maximum variation of  $0.2\text{‰}$  for TCE (Figure S11). Cis-DCE and

**Supplementary material**

VC isotopic variations are negligible, as well as concentration variations for all compounds, even for PCE. This means that PCE degradation does not affect significantly the evolution of concentrations and isotopic compositions of daughter chloroethenes due to its much lower concentration.

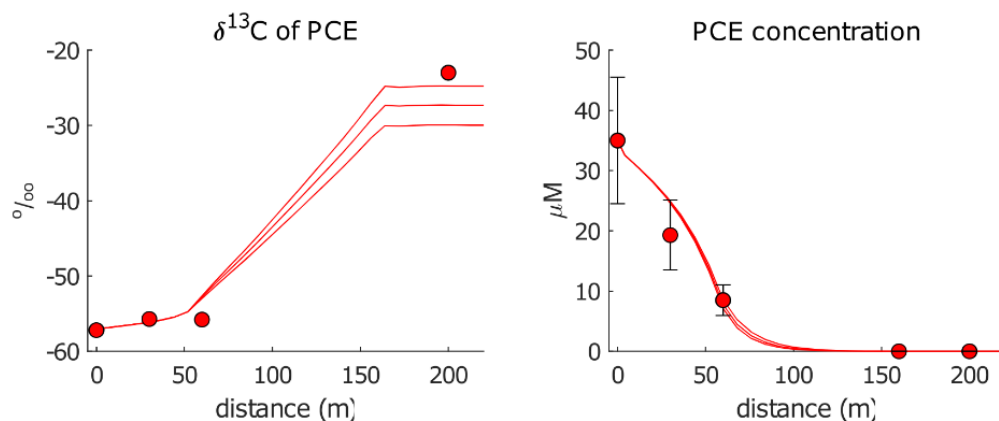

Figure S11 –  $k_{RD2}$  variation of PCE:  $\pm 1.0\%$ .

For TCE the variation of  $\pm 0.1\%$  in  $\epsilon_{RD}$  produces a negligible variation of the isotopic value ( $\pm 0.3\%$ ), while for a variation of  $\pm 1.0\%$  the isotopic variation is ten times higher ( $\pm 3.2\%$ ; Figure S12). No influence on the isotopic composition of DCE was observed.

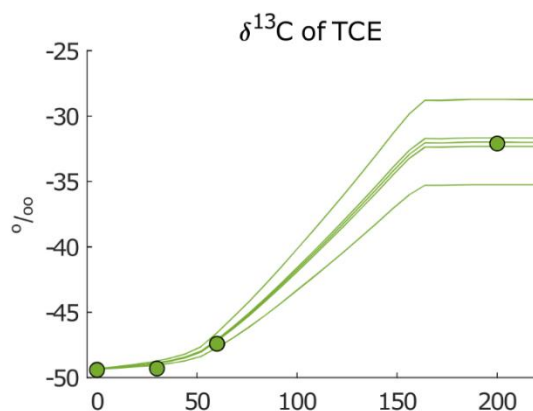

Figure S12 –  $\epsilon_{RD}$  variation of TCE:  $\pm 1.0\%$  and  $0.1\%$ .

**Supplementary material**

The variation of  $k_{RD2}$  of TCE by  $\pm 1.0$ , instead, caused an enrichment of 2.9‰ and a decrease of 3.7‰ in the isotopic composition of TCE as well as a variation of concentrations after the AN barrier. Maximum variations were observed at  $x=100\text{m}$  where the initial value of  $20.1\mu\text{M}$  was almost doubled ( $35.7\mu\text{M}$ ) for increased  $k_{RD2}$  and almost halved ( $12.5\mu\text{M}$ ) for decreased  $k_{RD2}$ .

Moreover, the variation of  $k_{RD2}$  caused a slight enrichment of 0.5‰ and a decrease of 0.9‰ in the isotopic composition of cis-DCE as well (measured in 206S), and a small variation in the accumulation of cis-DCE at the AN barrier was induced (Figure S13). Maximum variations were observed in Pz13: from  $256.5\mu\text{M}$  to  $266.3\mu\text{M}$  for decreased  $k_{RD2}$  and from  $256.5\mu\text{M}$  to  $242.8\mu\text{M}$  for increased  $k_{RD2}$ . No noteworthy variations for VC isotopic composition or concentration were observed.

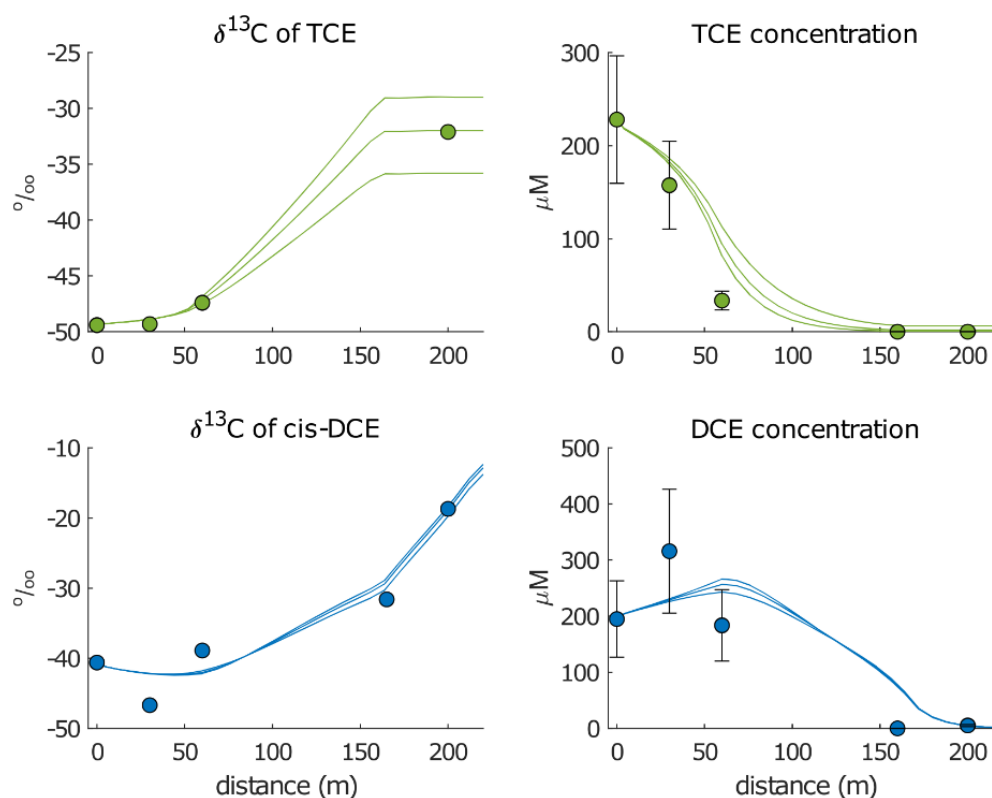

Figure S13 –  $k_{RD2}$  variation of TCE:  $\pm 1.0\%$ .

**Supplementary material**

For cis-DCE an  $\epsilon_{RD}$  variation of  $\pm 0.1\text{‰}$  did not produce noteworthy changes in isotopic values, while a bit higher variation was induced for  $\Delta\epsilon=\pm 1.0\text{‰}$  ( $\Delta^{13}\text{C}=\pm 1.0\text{‰}$ ; Figure S14). No influence on the isotopic composition of VC was observed.

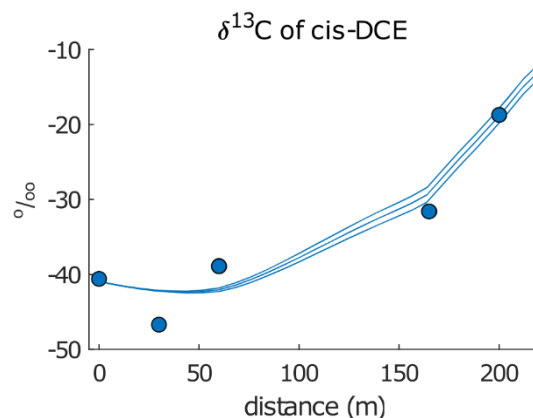

Figure S14 --  $\epsilon$  variation of cis-DCE:  $\pm 1.0\text{‰}$

The variation of  $k_{RD2}$  for cis-DCE by  $\pm 0.1$  produced in 206S an enrichment of  $1.7\text{‰}$  and an impoverishment of  $2.2\text{‰}$ . As for cis-DCE concentrations, the highest variations were observed between Pz13 and 206S were negative and positive variations of  $20\mu\text{M}$  compared to the initial value took place. No significant variations were observed for VC isotopic composition and concentrations.

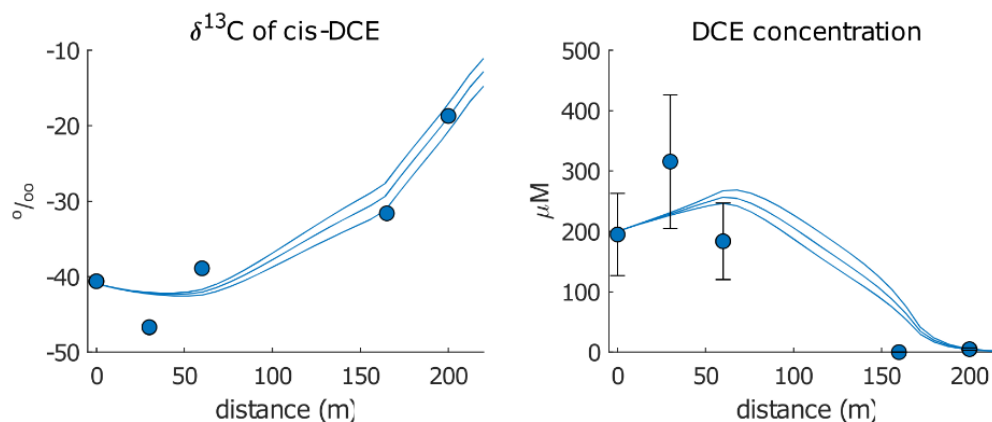

Figure S15 –  $k_{RD2}$  variation of cis-DCE:  $\pm 0.1\text{‰}$ .

**Supplementary material**

## Isotopic shifts

Isotopic shifts ( $\Delta^{13}\text{C}$ ) calculated for each compound as the difference between  $\delta^{13}\text{C}$  in the downgradient piezometer and  $\delta^{13}\text{C}$  in the respective upgradient piezometer.

*Table S4 Isotopic shifts ( $\Delta^{13}\text{C}$ ) along the transect for January and May 2021 data.*

| $\Delta^{13}\text{C}$ (‰) | ANAEROBIC |           | AEROBIC            |             |
|---------------------------|-----------|-----------|--------------------|-------------|
| January 2021              |           |           |                    |             |
|                           | Pz22→Pz10 |           | Pz10→206S          | 206S→AEext4 |
| PCE                       | 3.0       |           | 12.9 (Pz10→AEext4) |             |
| TCE                       | 2.4       |           | 8.5 (Pz10→AEext4)  |             |
| DCE                       | 2.5       |           | 11.4               | 14.9        |
| VC                        | -0.2      |           | 8.5                | 1.2         |
| May 2021                  |           |           |                    |             |
|                           | Pz22→Pz13 | Pz13→Pz10 | Pz10→206S          | 206S→AEext4 |
| PCE                       | 1.43      | -0.06     | 32.8 (Pz10→AEext4) |             |
| TCE                       | 0.12      | 1.87      | 15.3 (Pz10→AEext4) |             |
| DCE                       | -6.16     | 7.79      | 7.4                | 12.9        |
| VC                        | -0.64     | -0.18     | -9.3               | 14.5        |

Casiraghi *et al* (2022), Assessing a large-scale sequential in-situ chloroethene bioremediation system using compound-specific isotope analysis (CSIA) and geochemical modeling. *Pollutants*.

**Supplementary material**

1. Antelmi, M.; Mazzon, P.; Höhener, P.; Marchesi, M.; Alberti, L. Evaluation of MNA in A Chlorinated Solvents-Contaminated Aquifer Using Reactive Transport Modeling Coupled with Isotopic Fractionation Analysis. *Water* **2021**, *13*, 2945, doi:10.3390/w13212945.
2. Kuder, T.; Philp, P.; Van Breukelen, B.M.; Thouement, H.A.A.; Vanderford, M.; Newell, C.J. Integrated Stable Isotope – Reactive Transport Model Approach for Assessment of Chlorinated Solvent Degradation 2014.
3. Gelhar, L.W.; Welty, C.; Rehfeldt, K.R. A Critical Review of Data on Field-Scale Dispersion in Aquifers. *Water Resour. Res.* **1992**, *28*, 1955–1974, doi:10.1029/92WR00607.
